# Supplementary material for: Removal of metallic coatings from rare-earth permanent magnets by solutions of bromine in organic solvents
Source: Royal Society of Chemistry journal article supplement (doi:10.1039/c9ra01696a), 2019-01-01
Supplement: c9ra01696a1.pdf [file c9ra01696a1.pdf]

**Removal of metallic coatings from rare-earth  
permanent magnets by solutions of bromine in  
organic solvents**

Martina Orefice, Anas Eldosouky, Irena Škulj, Koen Binnemans\*

Electronic Supplementary Information (ESI)

## Results

**Table S1.** Dissolution yields,  $\eta$  (%), from SmCo<sub>5</sub> PMs in 2 M HNO<sub>3</sub> as function of the time, (min).

| t (min) | $\eta_{\text{Co}}$ (%) | RSD (%) | $\eta_{\text{Cu}}$ (%) | RSD (%) | $\eta_{\text{Ni}}$ (%) | RSD (%) | $\eta_{\text{Sm}}$ (%) | RSD (%) |
|---------|------------------------|---------|------------------------|---------|------------------------|---------|------------------------|---------|
| 0       | 0.0                    | –       | 0.0                    | –       | 0.0                    | –       | 0.0                    | –       |
| 30      | 0.0                    | –       | 0.0                    | –       | 28.1                   | 0.5     | 0.0                    | –       |
| 60      | 0.0                    | –       | 0.0                    | –       | 58.7                   | 1.6     | 0.0                    | –       |
| 90      | 0.0                    | –       | 0.0                    | –       | 80.2                   | 0.9     | 0.0                    | –       |
| 210     | 0.8                    | 1.4     | 0.0                    | –       | 80.8                   | 1.5     | 0.8                    | 1.7     |

**Table S2.** Dissolution yields,  $\eta$  (%), from Sm<sub>2</sub>Co<sub>17</sub> PMs in in 2 M HNO<sub>3</sub> as function of the time, (min).

| t (min) | $\eta_{\text{Co}}$ (%) | RSD (%) | $\eta_{\text{Cu}}$ (%) | RSD (%) | $\eta_{\text{Fe}}$ (%) | RSD (%) | $\eta_{\text{Ni}}$ (%) | RSD (%) | $\eta_{\text{Sm}}$ (%) | RSD (%) | $\eta_{\text{Zr}}$ (%) | RSD (%) |
|---------|------------------------|---------|------------------------|---------|------------------------|---------|------------------------|---------|------------------------|---------|------------------------|---------|
| 0       | 0.0                    | –       | 0.0                    | –       | 0.0                    | –       | 0.0                    | –       | 0.0                    | –       | 0.0                    | –       |
| 30      | 0.0                    | –       | 0.0                    | –       | 0.0                    | –       | 10.0                   | 0.6     | 0.0                    | –       | 0.0                    | –       |
| 60      | 0.0                    | –       | 0.0                    | –       | 0.0                    | –       | 12.3                   | 0.3     | 0.0                    | –       | 0.0                    | –       |
| 90      | 0.0                    | –       | 0.0                    | –       | 0.0                    | –       | 14.9                   | 1.4     | 0.0                    | –       | 0.0                    | –       |
| 210     | 0.0                    | –       | 0.0                    | –       | 0.0                    | –       | 32.3                   | 1.0     | 0.0                    | –       | 0.0                    | –       |

**Table S3.** Dissolution yields,  $\eta$ (%), of metals from Nd–Fe–B PMs in 1 vol.% Br<sub>2</sub> in EtOH as function of the time, (min).

| t (min) | $\eta_B$ (%) | RSD (%) | $\eta_{Co}$ (%) | RSD (%) | $\eta_{Cu}$ (%) | RSD (%) | $\eta_{Dy}$ (%) | RSD (%) | $\eta_{Fe}$ (%) | RSD (%) |
|---------|--------------|---------|-----------------|---------|-----------------|---------|-----------------|---------|-----------------|---------|
| 5       | 0.3          | 18.9    | 0.0             | –       | 74.1            | 3.8     | 0.0             | –       | 0.0             | 5.8     |
| 10      | 0.3          | 20.6    | 0.2             | 7.9     | 91.7            | 4.0     | 0.1             | 5.6     | 0.1             | 6.0     |
| 20      | 0.9          | 13.8    | 1.0             | 2.8     | 89.7            | 3.0     | 0.9             | 2.5     | 1.0             | 4.5     |
| 30      | 2.8          | 8.5     | 1.0             | 6.3     | 84.1            | 5.5     | 1.2             | 1.9     | 1.1             | 3.4     |
| 45      | 3.1          | 7.8     | 2.3             | 2.5     | 91.6            | 5.5     | 2.6             | 2.2     | 2.5             | 4.5     |
| 60      | 3.6          | 7.4     | 3.3             | 0.2     | 99.9            | 5.1     | 3.6             | 2.1     | 3.3             | 5.2     |

| t (min) | $\eta_{Nd}$ (%) | RSD (%) | $\eta_{Ni}$ (%) | RSD (%) | $\eta_{Pr}$ (%) | RSD (%) |
|---------|-----------------|---------|-----------------|---------|-----------------|---------|
| 5       | 0.0             | –       | 28.6            | –       | 0.0             | –       |
| 10      | 0.1             | 2.8     | 66.9            | 2.8     | 0.1             | 2.8     |
| 20      | 0.7             | 4.5     | 74.7            | 4.5     | 1.2             | 4.5     |
| 30      | 1.0             | 2.4     | 63.4            | 2.4     | 1.6             | 2.4     |
| 45      | 2.2             | 1.8     | 74.0            | 1.8     | 3.5             | 1.8     |
| 60      | 3.1             | 1.0     | 87.2            | 1.0     | 5.0             | 1.0     |

**Table S4.** Dissolution yields,  $\eta$ (%), of metals from Nd–Fe–B PMs in 1 vol.% Br<sub>2</sub> in DMF as function of the time, (min).

| t (min) | $\eta_B$ (%) | RSD (%) | $\eta_{Co}$ (%) | RSD (%) | $\eta_{Cu}$ (%) | RSD (%) | $\eta_{Dy}$ (%) | RSD (%) | $\eta_{Fe}$ (%) | RSD (%) |
|---------|--------------|---------|-----------------|---------|-----------------|---------|-----------------|---------|-----------------|---------|
| 5       | 0.4          | 12.3    | 0.0             | –       | 85.0            | 2.4     | 0.0             | –       | 0.0             | 5.9     |
| 10      | 0.2          | 29.6    | 0.0             | –       | 86.2            | 3.5     | 0.0             | –       | 0.0             | 4.0     |
| 20      | 0.5          | 7.9     | 0.6             | 0.7     | 86.1            | 2.9     | 0.4             | 0.6     | 0.5             | 1.8     |
| 30      | 1.6          | 9.6     | 1.6             | 1.9     | 93.0            | 3.3     | 1.5             | 1.4     | 1.6             | 2.0     |
| 45      | 2.5          | 6.4     | 2.6             | 2.7     | 93.1            | 1.0     | 2.6             | 3.8     | 2.6             | 3.1     |
| 60      | 3.1          | 5.7     | 3.4             | 2.2     | 101.2           | 2.6     | 3.3             | 2.1     | 3.4             | 3.2     |

| t (min) | $\eta_{Nd}$ (%) | RSD (%) | $\eta_{Ni}$ (%) | RSD (%) | $\eta_{Pr}$ (%) | RSD (%) |
|---------|-----------------|---------|-----------------|---------|-----------------|---------|
| 5       | 0.0             | –       | 32.3            | 1.7     | 0.0             | –       |
| 10      | 0.0             | –       | 44.7            | 1.7     | 0.0             | –       |
| 20      | 0.4             | 2.6     | 61.7            | 1.0     | 0.6             | 5.5     |
| 30      | 1.4             | 1.1     | 86.1            | 1.8     | 2.0             | 5.0     |
| 45      | 2.2             | 4.4     | 90.5            | 1.8     | 3.3             | 5.8     |
| 60      | 2.8             | 2.6     | 102.2           | 1.5     | 4.2             | 3.8     |

**Table S5.** Dissolution yields,  $\eta$  (%), of metals from SmCo<sub>5</sub> PMs in 1 vol.% Br<sub>2</sub> in EtOH as function of the time, (min).

| t (min) | $\eta_{\text{Co}}$ (%) | RSD (%) | $\eta_{\text{Cu}}$ (%) | RSD (%) | $\eta_{\text{Ni}}$ (%) | RSD (%) | $\eta_{\text{Sm}}$ (%) | RSD (%) |
|---------|------------------------|---------|------------------------|---------|------------------------|---------|------------------------|---------|
| 5       | 0.0                    | –       | 1.4                    | 4.2     | 34.7                   | 1.3     | 0.0                    | –       |
| 10      | 0.0                    | –       | 19.8                   | 1.3     | 60.2                   | 0.8     | 0.0                    | –       |
| 20      | 0.2                    | 0.2     | 66.9                   | 1.9     | 83.6                   | 0.9     | 0.2                    | 1.8     |
| 30      | 0.7                    | 3.6     | 80.1                   | 5.9     | 92.7                   | 3.4     | 0.7                    | 4.7     |
| 50      | 1.9                    | 1.8     | 74.0                   | 3.8     | 94.0                   | 1.7     | 1.9                    | 2.5     |
| 80      | 3.2                    | 2.2     | 74.4                   | 6.3     | 94.3                   | 2.2     | 3.4                    | 6.5     |

**Table S6.** Dissolution yields,  $\eta$ (%), of metals from SmCo<sub>5</sub> PMs in 1 vol.% Br<sub>2</sub> in DMF as function of the time, (min).

| t (min) | $\eta_{\text{Co}}$ (%) | RSD (%) | $\eta_{\text{Cu}}$ (%) | RSD (%) | $\eta_{\text{Ni}}$ (%) | RSD (%) | $\eta_{\text{Sm}}$ (%) | RSD (%) |
|---------|------------------------|---------|------------------------|---------|------------------------|---------|------------------------|---------|
| 5       | 0.0                    | –       | 28.9                   | 0.8     | 55.0                   | 1.4     | 0.0                    | –       |
| 10      | 0.2                    | 0.2     | 69.7                   | 6.0     | 73.8                   | 0.2     | 0.1                    | 5.0     |
| 20      | 0.6                    | 1.0     | 76.6                   | 2.8     | 84.3                   | 0.5     | 0.6                    | 2.5     |
| 30      | 1.2                    | 1.0     | 81.1                   | 1.5     | 84.9                   | 0.9     | 1.4                    | 1.6     |
| 50      | 2.4                    | 0.6     | 75.6                   | 1.5     | 89.2                   | 0.5     | 2.4                    | 2.4     |
| 80      | 6.0                    | 1.1     | 75.8                   | 2.2     | 87.4                   | 1.3     | 6.7                    | 2.0     |

**Table S7.** Dissolution yields,  $\eta$ (%), of metals from  $\text{Sm}_2\text{Co}_{17}$  PMs in 1 vol.%  $\text{Br}_2$  in EtOH as function of the time, (min).

| t (min) | $\eta_{\text{Co}}$ (%) | RSD (%) | $\eta_{\text{Cu}}$ (%) | RSD (%) | $\eta_{\text{Fe}}$ (%) | RSD (%) | $\eta_{\text{Ni}}$ (%) | RSD (%) | $\eta_{\text{Sm}}$ (%) | RSD (%) | $\eta_{\text{Zr}}$ (%) | RSD (%) |
|---------|------------------------|---------|------------------------|---------|------------------------|---------|------------------------|---------|------------------------|---------|------------------------|---------|
| 5       | 0.0                    | –       | 11.6                   | 2.0     | 0.0                    | –       | 56.6                   | 1.7     | 0.0                    | –       | 0.0                    | –       |
| 10      | 0.0                    | –       | 89.6                   | 3.7     | 0.0                    | –       | 77.0                   | 2.4     | 0.0                    | –       | 0.0                    | –       |
| 20      | 0.5                    | 1.0     | 100.0                  | –       | 0.5                    | 16.2    | 103.2                  | 1.1     | 0.5                    | 3.9     | 0.4                    | 8.8     |
| 30      | 1.0                    | 1.7     | 100.0                  | –       | 1.7                    | 1.1     | 103.5                  | 1.2     | 1.1                    | 6.5     | 0.8                    | 4.4     |
| 50      | 1.8                    | 1.0     | 100.0                  | –       | 2.0                    | 1.9     | 93.5                   | 1.0     | 1.9                    | 2.1     | 1.5                    | 1.6     |
| 80      | 2.7                    | 1.1     | 100.0                  | –       | 3.0                    | 2.5     | 101.9                  | 3.6     | 2.8                    | 4.8     | 2.2                    | 3.9     |

**Table S8.** Dissolution yields,  $\eta$ (%), of metals from  $\text{Sm}_2\text{Co}_{17}$  PMs in 1 vol.%  $\text{Br}_2$  in DMF as function of the time, (min).

| t (min) | $\eta_{\text{Co}}$ (%) | RSD (%) | $\eta_{\text{Cu}}$ (%) | RSD (%) | $\eta_{\text{Fe}}$ (%) | RSD (%) | $\eta_{\text{Ni}}$ (%) | RSD (%) | $\eta_{\text{Sm}}$ (%) | RSD (%) | $\eta_{\text{Zr}}$ (%) | RSD (%) |
|---------|------------------------|---------|------------------------|---------|------------------------|---------|------------------------|---------|------------------------|---------|------------------------|---------|
| 5       | 0.0                    | –       | 53.9                   | 5.0     | 0.0                    | –       | 60.2                   | 0.5     | 0.0                    | –       | 0.0                    | –       |
| 10      | 0.1                    | 0.4     | 87.9                   | 1.4     | 0.1                    | 0.7     | 82.9                   | 1.4     | 0.1                    | 0.4     | 0.0                    | –       |
| 20      | 1.0                    | 1.8     | 100.0                  | –       | 1.1                    | 0.4     | 101.2                  | 1.1     | 1.0                    | 2.4     | 0.0                    | –       |
| 30      | 2.2                    | 1.6     | 100.0                  | –       | 2.5                    | 1.8     | 102.3                  | 0.8     | 2.4                    | 2.3     | 0.0                    | –       |
| 50      | 3.6                    | 1.9     | 100.0                  | –       | 4.0                    | 1.9     | 102.4                  | 2.2     | 3.9                    | 5.6     | 0.0                    | –       |
| 80      | 4.4                    | 1.1     | 100.0                  | –       | 4.9                    | 1.7     | 103.5                  | 1.3     | 4.5                    | 2.0     | 0.0                    | –       |
